# Supplementary material
Source: MDPI journal article supplement (https://www.mdpi.com/2311-5637/8/12/753)

## Supplementary Tables

| Peak | Constituents            | I.r.i. <sup>a</sup> | Relative abundance (%) |      |                |      |      |      |      |      |      |      |      |      |      |      |      |      |      |      |      |      |      |      |      |      |  |
|------|-------------------------|---------------------|------------------------|------|----------------|------|------|------|------|------|------|------|------|------|------|------|------|------|------|------|------|------|------|------|------|------|--|
|      |                         |                     | CG                     |      |                |      |      | FM   |      |      |      |      | NW   |      |      |      |      | W    |      |      |      |      |      |      |      |      |  |
|      |                         |                     | CA                     | CI   | CO             | ME   | MO   | SA   | CA   | CI   | CO   | ME   | MO   | SA   | CA   | CI   | CO   | ME   | MO   | SA   | CA   | CI   | CO   | ME   | MO   | SA   |  |
| 1    | methanol                | 353                 | tr <sup>b</sup>        | 0.2  | - <sup>c</sup> | 0.2  | -    | tr   | -    | -    | -    | -    | -    | -    | -    | -    | -    | -    | -    | -    | -    | -    | -    | -    | -    | -    |  |
| 2    | ethanol                 | 427                 | 0.2                    | 4.4  | 2.7            | -    | 2    | 0.1  | 17.1 | 18.9 | 24.3 | 21.2 | 16.6 | 16.8 | 20.1 | 21.3 | 26.6 | 23.4 | 18.2 | 20.9 | 20.9 | 29.3 | 25.9 | 25.2 | 22.2 | 18.9 |  |
| 3    | butyl methyl ether      | 604                 | 0.4                    | 3.5  | 13.8           | 0.2  | 1.1  | 0.2  | 8.1  | 9.6  | 11.4 | 8.7  | 9    | 9.4  | 10.1 | 11.2 | 12.1 | 10.5 | 10.1 | 11.7 | 13.4 | 17.4 | 16.3 | 15.3 | 14.4 | 12   |  |
| 4    | isoamyl alcohol         | 736                 | -                      | tr   | 0.2            | 0.2  | -    | tr   | 18.5 | 23.4 | 23.2 | 24.9 | 18.1 | 22.5 | 20.6 | 21.5 | 22.8 | 25.4 | 18.6 | 21.9 | 20.7 | 22.1 | 22.1 | 26.1 | 22.3 | 25.6 |  |
| 5    | 2,3-butanediol          | 789                 | -                      | -    | -              | 0.1  | -    | -    | -    | -    | -    | -    | -    | -    | -    | -    | tr   | -    | -    | -    | -    | tr   | -    | -    | -    | -    |  |
| 6    | ethyl butyrate          | 798                 | -                      | -    | -              | tr   | -    | -    | 0.1  | 0.1  | 0.1  | tr   | 0.2  | 0.1  | 0.2  | 0.1  | 0.1  | tr   | 0.2  | 0.1  | 0.1  | 0.1  | 0.1  | tr   | 0.2  | 0.1  |  |
| 7    | hexanal                 | 802                 | 6.1                    | -    | 1.4            | 7.7  | 9.3  | 15   | -    | -    | -    | -    | -    | -    | -    | -    | -    | -    | -    | -    | -    | -    | -    | -    | -    | -    |  |
| 8    | 2-methylethyl butanoate | 855                 | tr                     | -    | -              | tr   | tr   | 0.1  | tr   | -    | tr   | tr   | tr   | -    | -    | 0.1  | tr   | -    | -    | -    | 0.1  | 0.2  | 0.1  | 0.2  | 0.1  | 0.2  |  |
| 9    | (E)-2-hexenal           | 856                 | 11.7                   | 1.1  | 4.5            | 12.5 | tr   | 13.6 | -    | -    | -    | -    | -    | -    | -    | -    | -    | -    | -    | -    | -    | -    | -    | -    | -    | -    |  |
| 10   | (E)-3-hexenol           | 887                 | -                      | -    | -              | -    | 6.2  | -    | -    | -    | -    | -    | -    | -    | -    | -    | -    | -    | -    | -    | -    | -    | -    | -    | -    | -    |  |
| 11   | 1-hexanol               | 870                 | 12                     | 37.7 | 24.5           | 13.4 | 14.9 | 4.7  | 0.1  | 0.1  | 0.2  | 0.2  | tr   | 0.2  | 0.2  | 0.1  | 0.2  | 0.1  | tr   | 0.2  | 0.1  | 0.1  | 0.2  | 0.1  | tr   | 0.2  |  |
| 12   | isopentyl acetate       | 878                 | -                      | -    | -              | -    | -    | -    | 4.6  | 6.1  | 3    | 3.1  | 10.3 | 9.8  | 3    | 2.1  | 2.5  | 2    | 5.1  | 4.3  | 3.2  | 2    | 2.3  | 2.2  | 4.8  | 4    |  |
| 13   | 2-methylbutyl acetate   | 880                 | tr                     | 0.5  | tr             | tr   | tr   | tr   | -    | -    | -    | -    | -    | -    | tr   | tr   | -    | tr   | -    | -    | tr   | tr   | tr   | tr   | tr   | tr   |  |
| 14   | α-pinene                | 941                 | 0.2                    | 0.1  | 0.8            | 0.3  | 0.1  | 0.3  | 0.2  | tr   | 0.8  | -    | -    | -    | -    | 0.3  | -    | tr   | tr   | -    | -    | -    | -    | -    | -    | -    |  |
| 15   | camphene                | 954                 | 0.7                    | 0.5  | 0.1            | -    | 0.4  | 0.9  | tr   | tr   | tr   | tr   | -    | tr   | -    | 0.7  | -    | 0.1  | tr   | -    | tr   | -    | -    | -    | -    | -    |  |
| 16   | 1-heptanol              | 970                 | -                      | 0.2  | tr             | 0.2  | tr   | tr   | -    | -    | -    | -    | -    | -    | -    | -    | -    | -    | -    | -    | -    | -    | -    | -    | -    | -    |  |
| 17   | sabinene                | 978                 | -                      | -    | 0.2            | 2.4  | 0.1  | tr   | -    | -    | -    | -    | -    | -    | -    | -    | -    | -    | -    | -    | -    | -    | -    | -    | -    | -    |  |
| 18   | β-pinene                | 982                 | 1.3                    | 0.6  | -              | -    | 0.3  | 1.3  | tr   | tr   | 0.1  | tr   | tr   | tr   | tr   | 0.7  | -    | 0.2  | tr   | -    | -    | -    | -    | -    | -    | -    |  |
| 19   | 6-methyl-5-hepten-2-one | 985                 | tr                     | tr   | -              | tr   | 0.2  | -    | tr   | tr   | -    | tr   | tr   | tr   | tr   | tr   | -    | tr   | tr   | tr   | tr   | -    | -    | -    | -    | -    |  |
| 20   | hexanoic acid           | 986                 | 0.1                    | tr   | tr             | -    | -    | -    | tr   | 0.1  | 0.1  | 0.1  | tr   | 0.1  | tr   | 0.1  |  |
| 21   | myrcene                 | 993                 | 0.3                    | 0.3  | 0.4            | 0.2  | 0.3  | tr   | tr   | -    | tr   | tr   | -    | -    | tr   | 0.1  | -    | tr   | tr   | tr   | -    | -    | -    | -    | -    | -    |  |
| 22   | 3-octanol               | 995                 | 0.2                    | 0.1  | tr             | 0.1  | tr   | tr   | -    | -    | -    | -    | -    | -    | -    | -    | -    | -    | -    | -    | -    | -    | -    | -    | -    | -    |  |
| 23   | ethyl hexanoate         | 999                 | -                      | 0.2  | tr             | tr   | 0.1  | tr   | 9.2  | 6.5  | 7.8  | 8.1  | 8.7  | 7.6  | 6.2  | 4.6  | 5.6  | 4.2  | 6.2  | 5.4  | 6.8  | 4.5  | 6.1  | 4.1  | 5.6  | 6.3  |  |
| 24   | (E)-3-hexenyl acetate   | 1004                | 0.3                    | -    | 0.3            | tr   | 1    | tr   | -    | -    | -    | -    | -    | -    | -    | -    | -    | -    | -    | -    | -    | -    | -    | -    | -    | -    |  |
| 25   | α-phellandrene          | 1005                | -                      | 0.1  | tr             | 0.2  | 0.1  | tr   | -    | -    | -    | -    | -    | -    | -    | -    | -    | -    | -    | -    | -    | -    | -    | -    | -    | -    |  |
| 26   | δ-3-carene              | 1010                | 0.4                    | 0.2  | tr             | 0.1  | 0.1  | 0.2  | -    | -    | -    | -    | -    | -    | -    | -    | -    | -    | -    | -    | -    | -    | -    | -    | -    | -    |  |

|    |                                |      |      |     |     |     |     |     |     |     |     |     |     |     |     |     |     |     |     |     |     |     |     |     |     |     |
|----|--------------------------------|------|------|-----|-----|-----|-----|-----|-----|-----|-----|-----|-----|-----|-----|-----|-----|-----|-----|-----|-----|-----|-----|-----|-----|-----|
| 27 | 1-hexyl acetate                | 1011 | tr   | 2.3 | 0.8 | 0.1 | 0.6 | -   | 0.3 | 0.1 | tr  | 0.1 | 0.3 | 0.5 | tr  | 0.1 | tr  | tr  | tr  | 0.1 | tr  | 0.1 | tr  | tr  | tr  | 0.1 |
| 28 | (E)-2-hexen-1-ol acetate       | 1013 | -    | 5.3 | 1.3 | -   | 0.8 | -   | -   | -   | -   | -   | -   | -   | -   | -   | -   | -   | -   | -   | -   | -   | -   | -   | -   |     |
| 29 | $\alpha$ -terpinene            | 1018 | 0.3  | -   | tr  | 0.3 | tr  | 0.1 | -   | -   | -   | -   | -   | -   | tr  | -   | tr  | -   | -   | -   | -   | -   | -   | -   | -   |     |
| 30 | <i>p</i> -cymene               | 1027 | 2.7  | 2.5 | 0.1 | 0.2 | 1.5 | 1.1 | tr  | tr  | tr  | -   | -   | -   | -   | 0.8 | -   | 0.6 | -   | tr  | -   | -   | tr  | -   | -   | -   |
| 31 | limonene                       | 1032 | 3.5  | 3.3 | 0.3 | 1.6 | 2.1 | 1.9 | tr  | tr  | 0.2 | -   | -   | tr  | -   | 1.3 | -   | 0.4 | tr  | -   | tr  | tr  | tr  | tr  | tr  | tr  |
| 32 | 1,8-cineole                    | 1034 | 10.5 | 3.9 | 8   | 4.4 | 6.5 | 2.3 | 0.2 | 0.2 | tr  | -   | -   | -   | -   | -   | -   | 0.3 | -   | -   | -   | -   | -   | -   | -   |     |
| 33 | $\gamma$ -terpinene            | 1062 | 0.7  | 1.1 | tr  | 0.3 | 0.4 | 0.4 | tr  | tr  | tr  | -   | -   | -   | tr  | 0.3 | -   | 0.1 | tr  | tr  | tr  | -   | tr  | -   | tr  | -   |
| 34 | 1-octanol                      | 1071 | tr   | 0.2 | tr  | tr  | -   | tr  |
| 35 | terpinolene                    | 1088 | -    | 1   | tr  | 3.9 | -   | -   | tr  | tr  | tr  | tr  | -   | -   | -   | 0.1 | -   | tr  | tr  | tr  | tr  | 0.1 | -   | -   | -   | -   |
| 36 | fenchone                       | 1089 | 1.7  | -   | -   | -   | 1.6 | 0.5 | -   | -   | -   | -   | -   | -   | -   | -   | -   | -   | -   | -   | -   | -   | -   | -   | -   |     |
| 37 | <i>p</i> -mentha-2,4(8)-diene  | 1090 | -    | -   | -   | -   | -   | -   | -   | -   | -   | -   | -   | -   | -   | -   | -   | -   | -   | -   | -   | -   | -   | -   | -   |     |
| 38 | 2-nonanone                     | 1093 | -    | 0.2 | 0.1 | -   | tr  | -   | -   | tr  | -   | tr  | tr  | -   | -   | tr  | -   | -   | tr  |
| 39 | ethyl heptanoate               | 1098 | -    | tr  | -   | -   | -   | -   | tr  | 0.1 | tr  | tr  | tr  | tr  | -   | 0.2 | 0.1 | tr  | -   | tr  | tr  | 0.1 | tr  | tr  | tr  | tr  |
| 40 | <i>n</i> -undecane             | 1100 | 0.5  | 0.7 | tr  | tr  | 0.3 | 0.3 | -   | -   | -   | -   | -   | -   | -   | -   | -   | -   | -   | -   | -   | -   | -   | -   | -   |     |
| 41 | isopentyl-2-methyl butanoate   | 1102 | -    | -   | 0.1 | tr  | -   | -   | tr  | tr  | -   | -   | -   | -   | -   | -   | -   | -   | -   | -   | tr  | -   | -   | -   | -   | -   |
| 42 | nonanal                        | 1103 | -    | 0.4 | 0.5 | 1.6 | 1.2 | 0.7 | -   | -   | tr  | tr  | tr  | tr  | tr  | 0.1 | tr  | 0.1 | tr  | tr  | 0.1 | 0.1 | 0.1 | tr  | tr  | tr  |
| 43 | $\alpha$ -thujone              | 1106 | 2    | 0.4 | 0.5 | -   | -   | -   | -   | -   | -   | -   | -   | -   | -   | -   | -   | -   | -   | -   | -   | -   | -   | -   | -   |     |
| 44 | phenylethyl alcohol            | 1110 | tr   | -   | tr  | tr  | -   | -   | 2.8 | 2.3 | 2.6 | 3.3 | 2   | 2.2 | 2.6 | 2.5 | 2.7 | 3.9 | 2.1 | 2.5 | 3.4 | 2.8 | 2.4 | 4.5 | 2.7 | 3.3 |
| 45 | <i>endo</i> -fenchol           | 1113 | 0.6  | 0.5 | tr  | -   | 0.4 | 0.2 | -   | -   | -   | -   | -   | -   | -   | -   | -   | -   | -   | -   | -   | -   | -   | -   | -   |     |
| 46 | $\beta$ -thujone               | 1118 | 0.6  | 0.3 | tr  | 0.1 | 0.3 | 0.1 | -   | -   | -   | -   | -   | -   | -   | -   | -   | -   | -   | -   | -   | -   | -   | -   | -   |     |
| 47 | camphor                        | 1143 | 2.8  | 1.7 | 0.4 | 0.6 | 2.7 | 0.8 | tr  | tr  | -   | -   | -   | -   | -   | tr  | -   | tr  | -   | -   | -   | -   | -   | -   | -   | -   |
| 48 | menthone                       | 1154 | 1.4  | 0.3 | -   | tr  | 0.2 | 0.4 | -   | -   | -   | -   | tr  | tr  | -   | tr  | -   | tr  | tr  | -   | -   | -   | -   | -   | -   | -   |
| 49 | <i>isomenthone</i>             | 1164 | 0.4  | 0.6 | -   | -   | -   | 0.3 | -   | -   | -   | -   | -   | -   | -   | -   | -   | -   | -   | -   | -   | -   | -   | -   | -   |     |
| 50 | <i>trans</i> -pinocamphone     | 1165 | -    | -   | 0.2 | -   | -   | tr  | -   | -   | -   | -   | -   | -   | -   | -   | -   | -   | -   | -   | -   | -   | -   | -   | -   |     |
| 51 | borneol                        | 1167 | -    | 0.2 | -   | -   | -   | -   | -   | -   | -   | -   | -   | -   | -   | -   | -   | -   | -   | -   | -   | -   | -   | -   | -   |     |
| 52 | 4-ethyl phenol                 | 1169 | 0.9  | 0.2 | -   | tr  | -   | -   | -   | -   | -   | -   | -   | tr  | -   | -   | -   | -   | -   | tr  | tr  | tr  | -   | tr  | tr  | -   |
| 53 | <i>neo</i> -menthol            | 1170 | 1.6  | -   | -   | 1.1 | 0.9 | 0.3 | -   | -   | -   | -   | -   | -   | -   | -   | -   | -   | -   | -   | -   | -   | -   | -   | -   |     |
| 54 | octanoic acid                  | 1175 | -    | -   | -   | -   | -   | -   | 0.2 | 0.2 | 0.1 | tr  | 0.1 | 0.7 | tr  | tr  | tr  | tr  | tr  | tr  | 0.1 | tr  | tr  | tr  | tr  | tr  |
| 55 | 1-nonanol                      | 1176 | -    | 1.6 | 0.2 | -   | -   | -   | -   | -   | -   | -   | -   | -   | -   | -   | -   | -   | -   | -   | -   | -   | tr  | -   | -   | -   |
| 56 | umbellulone                    | 1177 | -    | -   | 0.2 | 0.3 | -   | -   | -   | -   | -   | -   | -   | -   | -   | -   | -   | -   | -   | -   | -   | -   | -   | -   | -   |     |
| 57 | 4-terpineol                    | 1178 | 0.3  | 0.5 | tr  | 0.1 | 0.2 | tr  | -   | -   | -   | -   | -   | -   | -   | -   | -   | -   | -   | -   | -   | -   | -   | -   | -   | -   |
| 58 | butanedioic acid diethyl ester | 1179 | tr   | tr  | tr  | tr  | tr  | tr  | -   | tr  | -   | -   | tr  | -   | tr  | 0.2 | 0.1 | 0.1 | 0.2 | 0.2 |
| 59 | $\alpha$ -terpineol            | 1189 | 0.2  | tr  | tr  | -   | -   | tr  | -   | -   | -   | -   | -   | -   | -   | -   | -   | -   | -   | -   | -   | -   | -   | -   | -   | -   |
| 60 | methyl salicylate              | 1192 | 0.2  | tr  | tr  | 0.1 | -   | tr  | -   | tr  | -   | -   | tr  | -   | -   | tr  | tr  | tr  | tr  | tr  |

|    |                                        |      |     |     |     |     |     |     |      |     |      |      |      |      |      |      |      |       |      |      |      |      |      |      |      |      |
|----|----------------------------------------|------|-----|-----|-----|-----|-----|-----|------|-----|------|------|------|------|------|------|------|-------|------|------|------|------|------|------|------|------|
| 61 | ethyl octanoate                        | 1196 | -   | -   | tr  | -   | -   | -   | 15.9 | 15  | 12.5 | 14.2 | 17.1 | 15.1 | 23.6 | 19.3 | 17.5 | 17.84 | 25.4 | 20.9 | 20.9 | 13.8 | 16.3 | 13.3 | 17.9 | 16.8 |
| 62 | methyl chavicol                        | 1197 | 1.5 | 1   | -   | -   | 0.6 | 0.5 | -    | -   | -    | -    | -    | -    | -    | -    | -    | -     | -    | -    | -    | -    | -    | -    | -    |      |
| 63 | <i>n</i> -dodecane                     | 1200 | -   | -   | 0.2 | 0.5 | -   | tr  | -    | -   | -    | -    | -    | -    | -    | -    | -    | -     | -    | -    | -    | -    | -    | -    | -    |      |
| 64 | decanal                                | 1204 | 2.1 | 0.4 | 0.8 | 3   | 3.7 | 1.1 | tr   | tr  | tr   | -    | tr   | tr   | tr   | -    | -    | tr    | tr   | tr   | tr   | tr   | tr   | tr   | tr   | tr   |
| 65 | octanol acetate                        | 1214 | 0.3 | 0.1 | -   | -   | tr  | 0.2 | tr   | tr  | tr   | tr   | tr   | tr   | -    | -    | -    | -     | tr   | -    | -    | -    | -    | -    | -    |      |
| 66 | citronellol                            | 1230 | 0.1 | -   | -   | -   | -   | -   | tr   | tr  | tr   | tr   | tr   | tr   | tr   | -    | -    | -     | -    | -    | tr   | -    | tr   | tr   | -    | tr   |
| 67 | thymol methyl ether                    | 1235 | -   | 0.1 | -   | tr  | 0.2 | -   | -    | -   | -    | -    | -    | -    | -    | -    | -    | -     | -    | -    | -    | -    | -    | -    | -    |      |
| 68 | pulegone                               | 1237 | 0.4 | tr  | -   | -   | 0.2 | 0.2 | -    | -   | -    | -    | -    | -    | -    | -    | -    | -     | -    | -    | -    | -    | -    | -    | -    |      |
| 69 | carvone                                | 1244 | 0.3 | 0.2 | -   | -   | 0.1 | 0.1 | -    | -   | -    | -    | -    | -    | -    | -    | -    | -     | -    | -    | -    | -    | -    | -    | -    |      |
| 70 | isopentyl hexanoate                    | 1255 | 0.6 | 0.5 | -   | -   | -   | -   | 0.2  | tr  | tr   | 0.2  | 0.1  | 0.1  | tr   | tr   | tr   | tr    | 0.1  | 0.1  | tr   | tr   | tr   | tr   | tr   | tr   |
| 71 | 2-phenyl ethyl acetate                 | 1258 | tr  | -   | -   | -   | -   | tr  | 0.3  | 0.1 | 0.1  | 0.1  | 0.2  | 0.2  | tr   | 0.3  | tr   | tr    | tr   | tr   | tr   | tr   | tr   | 0.1  | tr   | 0.1  |
| 72 | linalool acetate                       | 1259 | 0.8 | 0.2 | -   | 0.1 | 0.3 | 0.3 | -    | -   | -    | -    | -    | -    | -    | -    | -    | -     | -    | -    | -    | -    | -    | -    | -    |      |
| 73 | <i>trans</i> -sabinene hydrate acetate | 1260 | -   | -   | -   | -   | tr  | tr  | -    | -   | -    | -    | -    | -    | tr   | -    | tr   | -     | -    | tr   | tr   | tr   | tr   | tr   | tr   | 0.1  |
| 74 | 4-ethyl-2-methoxyphenol                | 1273 | -   | 0.1 | -   | -   | -   | tr  | -    | -   | -    | -    | -    | -    | -    | -    | -    | -     | -    | -    | -    | -    | tr   | -    | -    |      |
| 75 | <i>neo</i> -menthyl acetate            | 1274 | 0.1 | 0.1 | -   | 0.2 | 0.3 | tr  | -    | -   | -    | -    | -    | -    | -    | -    | -    | -     | -    | -    | -    | -    | -    | -    | -    |      |
| 76 | isobornyl acetate                      | 1285 | 7.7 | 3.1 | 0.3 | 0.3 | 5   | 3.4 | tr   | tr  | tr   | -    | -    | -    | tr   | tr   | tr   | 0.2   | tr   | tr   | tr   | -    | 0.1  | -    | -    | tr   |
| 77 | <i>trans</i> -sabinyl acetate          | 1291 | -   | -   | -   | tr  | -   | tr  | -    | -   | -    | -    | -    | -    | -    | -    | -    | -     | -    | tr   | tr   | -    | -    | -    | -    | -    |
| 78 | 2-undecanone                           | 1294 | -   | -   | 0.1 | -   | -   | -   | tr   | tr  | tr   | tr   | tr   | 0.1  | -    | -    | tr   | tr    | tr   | tr   | -    | -    | tr   | -    | -    | tr   |
| 79 | menthyl acetate                        | 1297 | 1.3 | 0.3 | -   | 0.4 | 0.7 | 0.6 | -    | -   | -    | -    | -    | -    | -    | -    | -    | -     | -    | -    | -    | -    | -    | -    | -    |      |
| 80 | ethyl nonanoate                        | 1320 | 0.2 | 0.2 | 0.3 | 2.5 | -   | tr  | 0.2  | 0.3 | 0.3  | 0.3  | 0.3  | 0.3  | 0.2  | tr   | 0.5  | tr    | tr   | tr   | 0.2  | 0.3  | 0.1  | 0.7  | 0.4  | 0.5  |
| 81 | <i>n</i> -tridecane                    | 1300 | 0.4 | 0.6 | 0.5 | 0.3 | 0.3 | 0.2 | -    | -   | -    | -    | -    | -    | -    | -    | -    | -     | -    | -    | -    | -    | -    | -    | -    |      |
| 82 | undecanal                              | 1306 | 0.2 | 0.1 | 0.1 | 0.3 | 0.4 | 0.1 | tr   | tr  | tr   | -    | -    | tr   | -    | -    | -    | -     | -    | tr   | -    | tr   | tr   | tr   | tr   | tr   |
| 83 | dihydrocarveol acetate                 | 1307 | -   | 0.2 | -   | tr  | -   | tr  | -    | -   | -    | -    | -    | -    | -    | -    | -    | -     | -    | -    | -    | -    | -    | -    | -    |      |
| 84 | <i>n</i> -nonanol acetate              | 1312 | -   | 1   | tr  | 1.2 | -   | tr  | -    | -   | -    | -    | -    | -    | -    | -    | -    | -     | -    | -    | -    | -    | -    | -    | -    |      |
| 85 | dihydro citronellol acetate            | 1319 | -   | 0.2 | 0.2 | -   | -   | tr  | -    | -   | -    | -    | -    | -    | -    | -    | -    | -     | -    | -    | -    | -    | -    | -    | -    |      |
| 86 | methyl decanoate                       | 1327 | tr  | 0.2 | 0.4 | -   | tr  | tr  | tr   | tr  | tr   | tr   | tr   | tr   | tr   | tr   | tr   | tr    | tr   | tr   | tr   | tr   | tr   | tr   | tr   | tr   |
| 87 | <i>neo-iso</i> -verbanol acetate       | 1328 | 0.3 | 0.2 | 0.1 | -   | tr  | tr  | -    | -   | -    | -    | -    | -    | -    | -    | -    | -     | -    | -    | -    | -    | -    | -    | -    |      |
| 88 | $\alpha$ -terpinyl acetate             | 1352 | 0.8 | 0.3 | tr  | -   | 0.4 | 0.3 | -    | -   | -    | -    | -    | -    | -    | -    | -    | -     | -    | -    | -    | -    | -    | -    | -    |      |
| 89 | citronellyl acetate                    | 1357 | tr  | tr  | 0.1 | tr  | -   | tr  | tr   | tr  | tr   | tr   | tr   | tr   | -    | -    | -    | -     | -    | -    | tr   | tr   | tr   | tr   | -    | tr   |
| 90 | cyclosativene                          | 1368 | 0.4 | 0.2 | 1.2 | 0.8 | tr  | -   | -    | -   | -    | -    | -    | -    | -    | -    | -    | -     | -    | -    | -    | -    | -    | -    | -    |      |
| 91 | $\alpha$ -copaene                      | 1376 | 0.3 | 0.4 | tr  | tr  | 0.4 | 0.1 | tr   | tr  | tr   | -    | -    | -    | -    | -    | -    | -     | -    | -    | -    | -    | -    | -    | -    |      |
| 92 | $\beta$ -bourbonene                    | 1384 | -   | -   | 1.5 | -   | -   | -   | -    | -   | -    | -    | -    | -    | -    | -    | -    | -     | -    | -    | -    | -    | -    | -    | -    |      |
| 93 | ( <i>E</i> )- $\beta$ -damascenone     | 1386 | 0.1 | 0.1 | tr  | tr  | tr  | tr  | tr   | tr  | tr   | tr   | tr   | tr   | tr   | -    | -    | tr    | tr   | tr   | tr   | tr   | tr   | tr   | tr   | tr   |

[illegible]



|                              |                             |      |      |      |      |      |      |      |      |      |      |      |      |      |      |      |      |      |      |      |      |      |      |      |      |      |
|------------------------------|-----------------------------|------|------|------|------|------|------|------|------|------|------|------|------|------|------|------|------|------|------|------|------|------|------|------|------|------|
| 160                          | ethyl hexadecanoate         | 1993 | -    | -    | -    | -    | -    | -    | tr   | 0.1  | tr   | tr   | tr   | tr   | -    | -    | -    | -    | -    | -    | tr   | tr   | tr   | tr   | tr   | tr   |
| 161                          | <i>epi</i> -13-manoyl oxide | 2017 | -    | 0.5  | 0.2  | 0.5  | 0.2  | -    | tr   | tr   | tr   | tr   | -    | tr   | -    | -    | -    | -    | -    | -    | -    | -    | tr   | -    | -    | -    |
| Monoterpene hydrocarbons     |                             |      | 10.1 | 9.7  | 1.9  | 9.5  | 5.4  | 6.2  | 0.2  | -    | 1.1  | -    | -    | -    | -    | 4.3  | -    | 1.4  | -    | -    | -    | 0.1  | -    | -    | -    | -    |
| Oxygenated monoterpenes      |                             |      | 32.6 | 13   | 10   | 8.4  | 19.9 | 9.2  | 0.2  | 0.2  | -    | -    | -    | -    | -    | -    | -    | 0.5  | -    | -    | -    | -    | 0.1  | -    | -    | 0.1  |
| Sesquiterpene hydrocarbons   |                             |      | 10.1 | 8.5  | 21.6 | 8.1  | 6    | 2.4  | -    | 0.1  | -    | -    | -    | -    | -    | 0.2  | 0.1  | -    | -    | -    | -    | -    | -    | -    | -    | -    |
| Oxygenated sesquiterpenes    |                             |      | 0.2  | -    | 0.9  | 2.7  | 0.7  | 4.9  | -    | -    | -    | -    | -    | -    | -    | -    | -    | -    | -    | -    | -    | -    | -    | -    | -    | -    |
| Oxygenated diterpenes        |                             |      | -    | 0.5  | 0.2  | 0.5  | 0.2  | -    | -    | -    | -    | -    | -    | -    | -    | -    | -    | -    | -    | -    | -    | -    | -    | -    | -    | -    |
| Apocarotenoids               |                             |      | 0.8  | 0.1  | 0.6  | 6.3  | 4.4  | 11.4 | -    | -    | 0.1  | 0.3  | 0.1  | 0.1  | -    | -    | -    | -    | -    | -    | 0.1  | -    | -    | -    | -    | -    |
| Phenylpropanoids             |                             |      | 1.5  | 1    | -    | -    | 0.6  | 0.5  | -    | -    | -    | -    | -    | -    | -    | -    | -    | -    | -    | -    | -    | -    | -    | -    | -    | -    |
| Non-terpene acids            |                             |      | 0.1  | -    | -    | 5.2  | -    | -    | 0.2  | 0.3  | 0.2  | 0.1  | 0.1  | 0.7  | -    | -    | -    | -    | -    | -    | 0.1  | -    | -    | 0.1  | -    | 0.1  |
| Non-terpene alcohols/phenols |                             |      | 13.3 | 44.7 | 27.6 | 14.1 | 23.1 | 4.8  | 38.5 | 44.7 | 50.3 | 49.6 | 36.7 | 41.7 | 43.5 | 45.4 | 52.3 | 52.8 | 38.9 | 45.5 | 45.1 | 54.3 | 50.6 | 55.9 | 47.2 | 48   |
| Non-terpene aldehydes        |                             |      | 20.1 | 2    | 7.3  | 25.1 | 14.6 | 30.5 | -    | -    | -    | -    | -    | -    | -    | 0.1  | -    | 0.1  | -    | -    | 0.1  | 0.1  | 0.1  | -    | -    | -    |
| Non-terpene esters           |                             |      | 3.3  | 10.6 | 3.3  | 7.2  | 3.5  | 4.1  | 50.4 | 43.5 | 34.9 | 29.3 | 53   | 46.5 | 45   | 37.8 | 34.3 | 33.3 | 49.8 | 41.6 | 39.4 | 27.3 | 31.8 | 27.5 | 37   | 37.5 |
| Non-terpene ethers           |                             |      | 0.4  | 3.5  | 13.8 | 0.2  | 1.1  | 0.2  | 8.1  | 9.6  | 11.4 | 8.7  | 9    | 9.4  | 10.1 | 11.2 | 12.1 | 10.5 | 10.1 | 11.7 | 13.4 | 17.4 | 16.3 | 15.3 | 14.4 | 12   |
| Non-terpene hydrocarbons     |                             |      | 1.3  | 2.3  | 1.9  | 3.8  | 2.1  | 1.5  | -    | -    | -    | -    | -    | -    | -    | -    | -    | -    | -    | -    | -    | -    | -    | -    | -    | -    |
| Non-terpene ketones          |                             |      | -    | 0.2  | 0.2  | -    | 0.2  | -    | -    | -    | -    | -    | -    | 0.1  | -    | -    | -    | -    | -    | -    | -    | -    | -    | -    | -    | -    |
| Total identified             |                             |      | 93.8 | 96.1 | 89.3 | 91.1 | 81.8 | 75.7 | 97.6 | 98.4 | 98   | 88   | 98.9 | 98.5 | 98.6 | 99   | 98.8 | 98.6 | 98.8 | 98.8 | 98.2 | 99.2 | 98.9 | 98.8 | 98.6 | 97.7 |

<sup>a</sup> Linear retention indices on a DB-5 column; <sup>b</sup> Traces, <0.1%; <sup>c</sup> Not detected. Abbreviations: CG=crushed and destemmed grapes; FM=fermented must with marcs; NW: new wine, 2 months old; W=wine, 7 months old; CA=Canaiolo; CI=Ciliegiolo; CO=Colorino; ME=Merlot; MO=Montepulciano; SA=Sangiovese.

**Figure S1.** Principal component analysis (PCA) loadings plot.

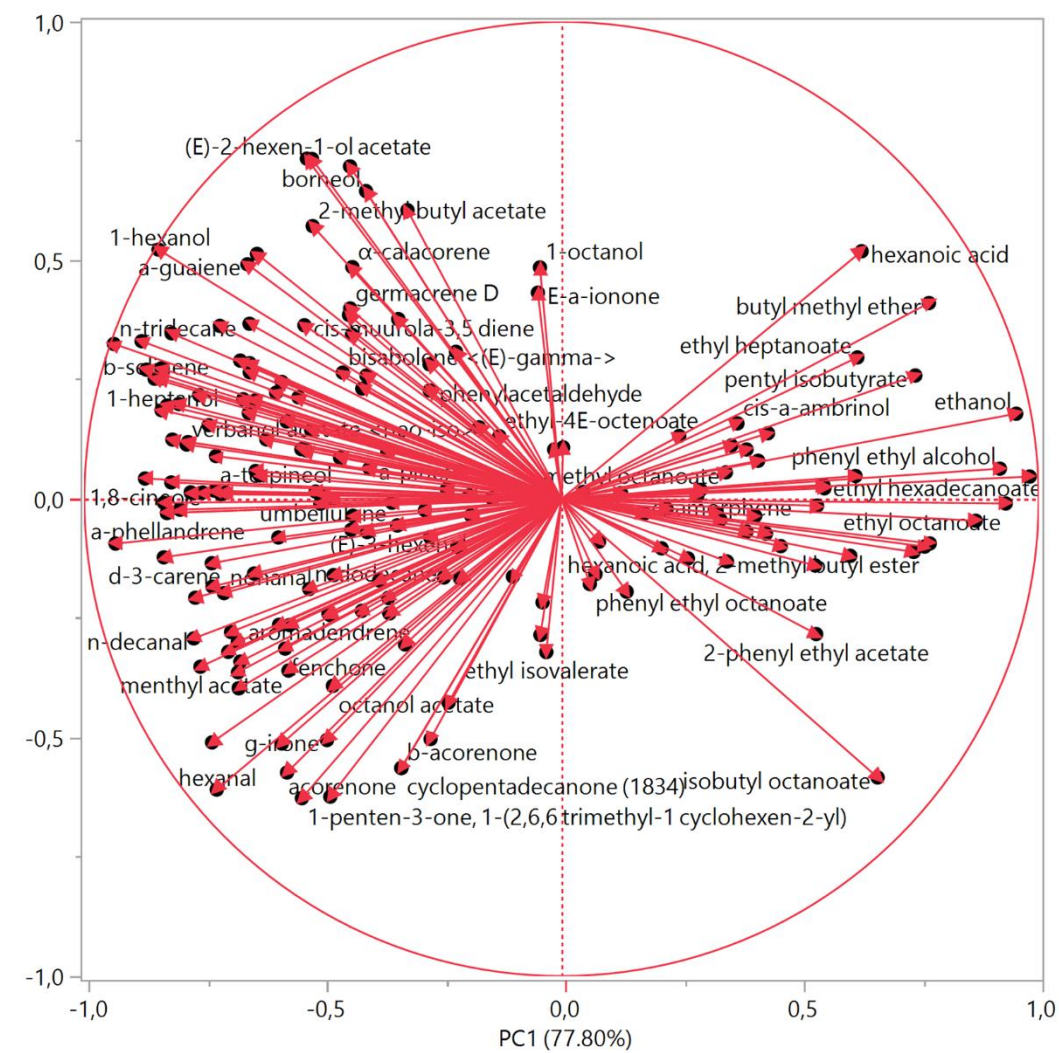

Supplement: s1 [file s1]
